# Supplementary material for: Analysis of the hormone receptor status of circulating tumor cell subpopulations based on epithelial-mesenchymal transition: a proof-of-principle study on the heterogeneity of circulating tumor cells
Source: PubMed Central journal article supplement (PMC5323209; doi:10.18632/oncotarget.11787), 2016-09-01
Supplement: oncotarget-07-65993-s001.pdf [file oncotarget-07-65993-s001.pdf]

## Analysis of the hormone receptor status of circulating tumor cell subpopulations based on epithelial-mesenchymal transition: a proof-of-principle study on the heterogeneity of circulating tumor cells

### SUPPLEMENTARY TABLES

Supplementary Table S1: Capture probe sequences for ER and PR genes

| Gene | Sequences (5'→3')    |
|------|----------------------|
| ER   | GAAAAAGAGCACAGCCCGAG |
|      | CGCTTGTGTTTCAACATTCT |
|      | GACGAGACCAATCATCAGGA |
|      | TGCAGATTCATCATGCGGAA |
|      | TTGGCTAAAGTGGTGCATGA |
|      | AGCAAATGAATGGCCACTCA |
| PR   | GTTCTCATTGAGAATGCCAC |
|      | TGCGACGGCAATTTAGTGAC |
|      | TTGTTAGGAGATCTCGTCTC |
|      | CGAAACTTCAGGCAAGGTGT |
|      | TAGGCACGTGGATGAAATCC |
|      | GACTCGAAGCTGTATTGTGG |

Supplementary Table S2: bDNA signal amplification probes sequences for ER and PR genes

|                                 | Function<br>(copies)      | Sequences (5'→3')                                | Complement                |
|---------------------------------|---------------------------|--------------------------------------------------|---------------------------|
| bDNA<br>probes for<br>ER and PR | capture<br>probe tail(1)  | AATCCTTTCTTTAATCTCAAATCAAATCTACAAATCCAATAATCTCAT | preamplifier<br>leader(1) |
|                                 | preamplifier<br>repeat(5) | ATGAGATTATTGGATTTGTAGATTATTATTGAGATGTGAAGTTTGTTT | amplifier<br>leader(1)    |
|                                 | amplifier<br>repeat(5)    | AAACAAACTTCACATCTCAATAAT                         | label<br>probe(1)         |

The sequences labeled “leader” appear once in the indicated construct, while sequences labeled “repeat” appear the indicated number of times. The tail on the capture probe is a single sequence.
